# Supplementary material
Source: publisher figshare collection journal article supplement (https://acs.figshare.com/ndownloader/files/4764655)
Supplement: Supplementary file 1 [file 4764655]

**Active-Site Models of Bacterial Nitric Oxide Reductase Featuring Tris-Histidyl  
and Glutamic Acid Mimics: Influence of Carboxylate Ligand on Fe<sub>B</sub> Binding and  
Heme-Fe/Fe<sub>B</sub> Redox Potentials**

James P. Collman,\* Yi-Long Yan, Jianping Lei, and Peter H. Dinolfo

*Department of Chemistry, Stanford University, California 94305-5080*

E-mail: [jpc@stanford.edu](mailto:jpc@stanford.edu)

## **Supporting Information**

**Preparation of NOR Model Ligands:** Compounds **1** (**1a–1c**) were prepared following a scheme recently developed in our laboratory (*Org. Lett.* **2006**, *8*, 923).

**Characterization of Compound 1a:** A solid. <sup>1</sup>H NMR (500 MHz, CDCl<sub>3</sub>): the carboxylic acid proton is not assigned, δ 8.77–8.94 (m, 8H), 8.71 (d, *J* = 8.0 Hz, 1H), 8.38 (d, *J* = 5.5 Hz, 2H), 8.23 (d, *J* = 7.0 Hz, 1H), 8.14 (d, *J* = 8.0 Hz, 1H), 8.07 (s, 1H), 8.03 (d, *J* = 7.0 Hz, 1H), 7.95 (d, *J* = 5.5 Hz, 2H), 7.78–7.88 (m, 5H), 7.61 (t, *J* = 7.5 Hz, 1H), 7.52–7.57 (m, 3H), 7.30 (s, 1H), 6.96 (s, 2H), 6.75 (s, 1H), 5.58 (s, 2H), 4.21 (s, 1H), 3.64 (s, 6H), 3.53 (s, 3H), 1.61 (t, *J* = 6.5 Hz, 2H), 1.12 (t, *J* = 6.5 Hz, 2H), 0.84–0.87 (m, 4H), –2.59 (s, 2H); <sup>13</sup>C NMR (CDCl<sub>3</sub>): δ 174.68, 172.15, 159.27, 157.35, 140.83, 140.27, 138.71, 138.59, 138.23, 136.14, 134.91, 134.34, 132.15, 131.40, 130.34, 130.12, 129.63, 129.50, 128.41, 126.25, 125.98, 125.43, 124.43, 123.96, 123.58, 120.27, 116.81, 113.22, 35.33, 33.73, 33.62, 32.32, 29.75, 20.29; MS (ESI): *m/e* 1113.4 for C<sub>64</sub>H<sub>53</sub>N<sub>14</sub>O<sub>6</sub> [M+H]<sup>+</sup>; HRMS (ESI) for C<sub>64</sub>H<sub>53</sub>N<sub>14</sub>O<sub>6</sub> [M+H]<sup>+</sup> calcd. 1113.4273, found 1113.4279.

**Characterization of Compound 1b:** A solid. <sup>1</sup>H NMR (500 MHz, CDCl<sub>3</sub>): δ 8.85–8.91 (m, 8H), 8.54 (d, *J* = 8.0 Hz, 2H), 8.37 (d, *J* = 8.0 Hz, 1H), 8.32 (d, *J* = 8.5 Hz, 1H), 8.25 (s, 1H), 8.09–8.12 (m, 3H), 7.99 (s, 1H), 7.91–7.94 (m, 3H), 7.83–7.86 (m, 3H), 7.78 (t, *J* = 7.5 Hz, 1H), 7.56–7.61 (m, 3H), 7.49 (t, *J* = 7.0 Hz, 1H), 7.02 (s, 2H), 6.94 (s, 1H), 5.61 (s, 1H), 5.16 (s, 2H), 3.66 (s, 6H), 3.58 (s, 3H), 2.79 (s, 3H), 1.49–1.55 (m, 4H), 1.20 (t, *J* = 7.5 Hz, 2H), –2.55 (s, 2H); <sup>13</sup>C NMR (CDCl<sub>3</sub>): δ 173.03, 171.80, 159.09, 158.51, 141.35, 141.22, 138.46, 138.20, 135.42, 135.20, 135.02, 133.45, 133.38, 132.18, 131.79, 131.61, 129.86, 129.71, 129.55, 125.78, 125.68, 124.79, 124.22, 124.12, 123.83, 122.47, 116.31, 115.22, 115.00, 50.83, 34.90, 33.76, 32.18, 23.89, 20.23; MS (ESI): *m/e* 1127.5 for C<sub>65</sub>H<sub>55</sub>N<sub>14</sub>O<sub>6</sub> [M+H]<sup>+</sup>; HRMS (ESI) for C<sub>65</sub>H<sub>55</sub>N<sub>14</sub>O<sub>6</sub> [M+H]<sup>+</sup> calcd. 1127.4429, found 1127.4425.

**Characterization of Compound 1c:** A solid.  $^1\text{H}$  NMR (500 MHz,  $\text{CDCl}_3$ ):  $\delta$  8.86–8.94 (m, 8H), 8.58 (d,  $J = 8.0$  Hz, 2H), 8.37 (d,  $J = 8.0$  Hz, 3H), 8.10–8.14 (m, 3H), 7.77–7.91 (m, 8H), 7.56–7.62 (m, 3H), 7.48 (t,  $J = 8.0$  Hz, 1H), 6.99 (s, 3H), 5.72 (s, 1H), 5.17 (s, 2H), 3.65 (s, 6H), 3.60 (s, 3H), 1.42–1.44 (m, 2H), 0.89–0.93 (m, 2H), 0.50–0.57 (m, 4H), 0.16 (t,  $J = 7.5$  Hz, 3H),  $-2.51$  (s, 2H);  $^{13}\text{C}$  NMR ( $\text{CDCl}_3$ ):  $\delta$  172.68, 159.26, 158.42, 141.34, 141.25, 138.49, 138.25, 135.50, 135.17, 135.09, 133.57, 133.17, 132.06, 131.69, 129.92, 129.69, 129.55, 125.71, 124.64, 124.53, 124.30, 123.73, 122.10, 116.29, 115.42, 114.79, 36.16, 33.80, 33.74, 30.58, 24.77, 21.90, 13.37; MS (ESI):  $m/e$  1096.2 for  $\text{C}_{65}\text{H}_{56}\text{N}_{14}\text{O}_4$   $[\text{M}]^+$ ; HRMS (ESI) for  $\text{C}_{65}\text{H}_{56}\text{N}_{14}\text{O}_4$   $[\text{M}+\text{H}]^+$  calcd. 1097.4687, found 1097.4688.

**Typical Procedure for Preparation of Diiron Complex 2 (Metalation of compound 1):** The reaction was conducted under  $\text{N}_2$  atmosphere in a dry glove box ( $\text{O}_2$  level < 1 ppm). All solvents and reagents were fully deoxygenated before use. To a stirred solution of compound **1a** (88 mg, 0.08 mmol) in dry THF (8 mL), was added anhydrous  $\text{FeCl}_2$  (50 mg, 0.39 mmol) followed by  $\text{K}_2\text{CO}_3$  (50 mg, 0.36 mmol). The mixture was stirred under  $\text{N}_2$  at room temperature overnight. TLC showed completion of the reaction (eluent:  $\text{CH}_3\text{OH}/\text{CH}_2\text{Cl}_2$  ( $\text{NH}_3$  saturated) = 15/85, v/v). The mixture was evaporated to dryness. The residue was stirred in dry  $\text{CH}_2\text{Cl}_2$  (10 mL) for 10 min. After filtration, the filtrate was concentrated to dryness to give compound **2a** as a solid (~90 mg, 90%). MS (ESI):  $m/e$  1256.6 for  $\text{C}_{64}\text{H}_{49}\text{N}_{14}\text{O}_6\text{ClFe}_2$   $[\text{M}]^+$ ; HRMS (ESI) for  $\text{C}_{64}\text{H}_{49}\text{N}_{14}\text{O}_6\text{ClFe}_2$   $[\text{M}]^+$  calcd. 1256.2347, found 1256.2341.

**Table S1.** Summary of High Resolution Mass Analysis for Iron Complexes **2a–2c** and **3a–3c** ( $\text{M}^+$ )

|            | <b>2a</b>                                                        | <b>2b</b>                                                                 | <b>2c</b>                                                                 |
|------------|------------------------------------------------------------------|---------------------------------------------------------------------------|---------------------------------------------------------------------------|
|            | $\text{C}_{64}\text{H}_{49}\text{N}_{14}\text{O}_6\text{ClFe}_2$ | $\text{C}_{65}\text{H}_{52}\text{N}_{14}\text{O}_6\text{Cl}_2\text{Fe}_2$ | $\text{C}_{65}\text{H}_{54}\text{N}_{14}\text{O}_4\text{Cl}_2\text{Fe}_2$ |
| Calculated | 1256.2347                                                        | 1306.2270                                                                 | 1276.2528                                                                 |
| Found      | 1256.2341                                                        | 1306.2213                                                                 | 1276.2465                                                                 |
|            | <b>3a</b>                                                        | <b>3b</b>                                                                 | <b>3c</b>                                                                 |
|            | $\text{C}_{64}\text{H}_{50}\text{N}_{14}\text{O}_6\text{Fe}$     | $\text{C}_{65}\text{H}_{52}\text{N}_{14}\text{O}_6\text{Fe}$              | $\text{C}_{65}\text{H}_{54}\text{N}_{14}\text{O}_4\text{Fe}$              |
| Calculated | 1166.3387                                                        | 1180.3544                                                                 | 1150.3802                                                                 |
| Found      | 1166.3386                                                        | 1180.3533                                                                 | 1150.3822                                                                 |

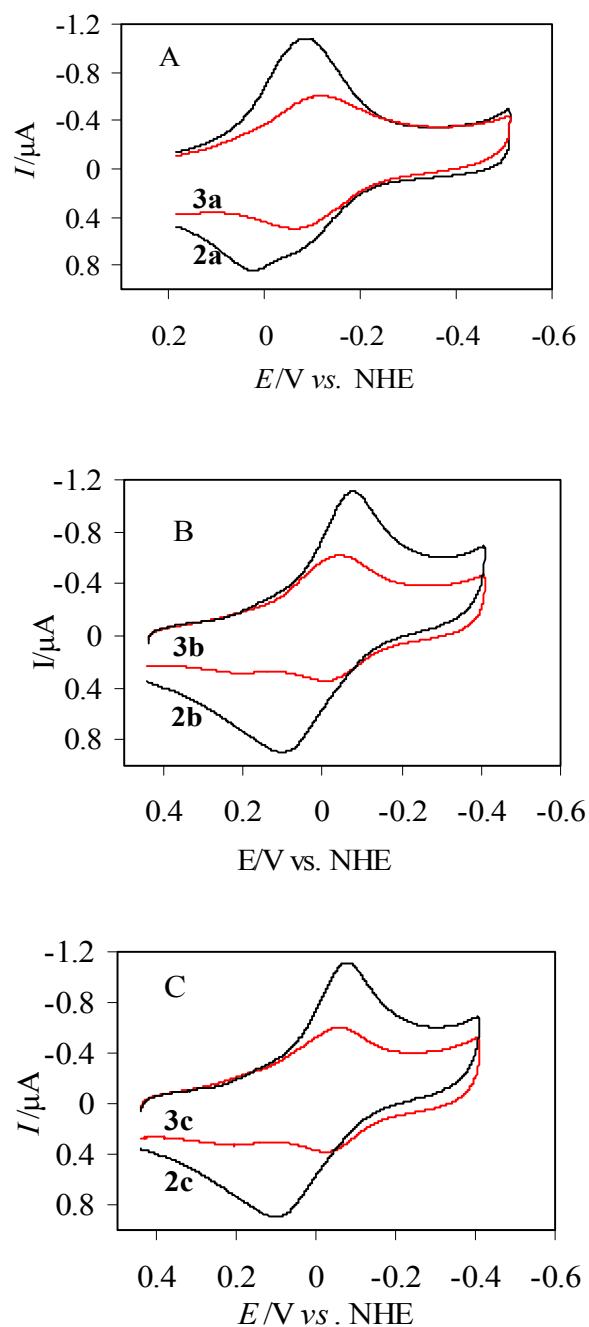

**Figure S1.** Cyclic Voltammograms (CVs) of Compound **2a**–**2c** and **3a**–**3c** in Anaerobic Phosphate Buffer solution (PBS) at an Edge Plane Graphite (EPG) Electrode,  $\nu=10\text{ mV s}^{-1}$ ,  $\Gamma=2.5\text{ nmol cm}^{-2}$ , pH=7.0 (A: Compound **2a**/**3a**; B: Compound **2b**/**2c**; C: Compound **2c**/**3c**)
